# Supplementary material for: Quantitative magnetic resonance cholangiopancreatography metrics are associated with disease severity and outcomes in people with primary sclerosing cholangitis
Source: PubMed Central journal article supplement — JHEP Rep. 2022 Sep 3;4(11):100577. doi: 10.1016/j.jhepr.2022.100577 (PMC9579413; doi:10.1016/j.jhepr.2022.100577), 2022-09-03
Supplement: mmc1.pdf [file mmc1.pdf]

## SUPPORTING MATERIAL

### Quantitative magnetic resonance cholangiopancreatography metrics are associated with disease severity and outcomes in patients with primary sclerosing cholangitis

Nora Cazzagon<sup>1,2,3</sup>, Sanaâ El Mouhadi<sup>4</sup>, Quentin Vanderbecq<sup>4</sup>, Carlos Ferreira<sup>5</sup>, Sarah Finnegan<sup>5</sup>, Sara Lemoine<sup>1,6</sup>, Christophe Corpechot<sup>1,6</sup>, Olivier Chazouillères<sup>1,6</sup>, Lionel Arrivé<sup>4</sup>

#### TABLE OF CONTENTS

|                                                                                                                                   |         |
|-----------------------------------------------------------------------------------------------------------------------------------|---------|
| Supplemental Table 1. MRCP+ metrics definition .....                                                                              | Page 2  |
| Supplemental Table 2. MRCP derived metrics in 77 PSC patients.....                                                                | Page 5  |
| Supplemental table 3. Correlations between different MRCP+ derived metrics.....                                                   | Page 8  |
| Supplemental table 4. Correlations between MRCP+ derived metrics, biochemical indices, liver stiffness and prognostic scores..... | Page 12 |
| Supplemental table 5. Distribution of MRCP derived metrics according ANALI score without gadolinium.....                          | Page 18 |
| References                                                                                                                        |         |

**Supplemental Table 1. MRCP+ metrics definition [1]**

|                                                                                                                                                                        | <b>Definition</b>                                                                                            |
|------------------------------------------------------------------------------------------------------------------------------------------------------------------------|--------------------------------------------------------------------------------------------------------------|
| Number of modelled ducts                                                                                                                                               | The total number of modelled ducts                                                                           |
| <b>Duct length metrics</b>                                                                                                                                             |                                                                                                              |
| Duct length mean / median / maximum (mm)                                                                                                                               | Statistics on the mean, median and maximum lengths (mm) of the modelled ducts, measured along the centreline |
| Duct length sum (mm)                                                                                                                                                   | Total length of the centrelines in the modelled tree (mm)                                                    |
| Duct diameter median (mm)                                                                                                                                              | The median over all ducts of the median diameter of each duct (mm)                                           |
| Duct diameter range [x,y] mm (%)                                                                                                                                       | The percentage of duct median diameters in the interval [x,y]                                                |
| Duct diameter $\geq 9$ mm (%)                                                                                                                                          | The percentage of duct median diameters $\geq 9$ mm                                                          |
| <b>Strictures metrics</b>                                                                                                                                              |                                                                                                              |
| Stricture number (n)                                                                                                                                                   | The number of ducts containing one or more strictures                                                        |
| Strictures types (n) <ul style="list-style-type: none"> <li>- Band (&lt;3 mm)</li> <li>- Segmental (3-10 mm)</li> <li>- Confluent (<math>\geq 10</math> mm)</li> </ul> | The number of each category of stricture based on the categorisation of their lengths                        |

|                                                           |                                                                                              |
|-----------------------------------------------------------|----------------------------------------------------------------------------------------------|
| Stricture length mean / max /sum (mm)                     | Statistics on the mean, maximum and total lengths (mm) of strictures                         |
| Stricture minimal diameter (mm)                           | The minimum diameter (mm) of the candidate strictures                                        |
| Absolute stricture severity                               | Minimum diameter – Closest maximum diameter                                                  |
| Relative stricture severity                               | $(\text{Absolute stricture severity} / \text{Closest maximum diameter}) \times 100$          |
| Stricture severity [absolute, relative] mean / max / sum  | Statistics on the mean, maximum and total of the absolute and relative stricture severities  |
| Stricture score                                           | Stricture length x (relative severity / 100)                                                 |
| Stricture score mean / max / sum                          | Statistics on the mean, maximum and total of the stricture score                             |
| <b>Dilatations metrics</b>                                |                                                                                              |
| Dilatation number                                         | The number of ducts containing one or more dilatation                                        |
| Dilatation maximum diameter (mm)                          | The maximum diameter (mm) of the candidate dilatations                                       |
| Absolute dilatation severity                              | Maximum diameter – Closest minimum diameter                                                  |
| Relative dilatation severity                              | $(\text{Absolute dilatation severity} / \text{Closest minimum diameter}) \times 100$         |
| Dilatation severity [absolute, relative] mean / max / sum | Statistics on the mean, maximum and total of the absolute and relative dilatation severities |
| Dilatation score                                          | Dilatation length x (relative severity / 100)                                                |
| Dilatation score mean / max / sum                         | Statistics on the mean, maximum and total of the dilatation score                            |
| <b>Strictures and/or dilatations</b>                      |                                                                                              |
| Ducts with $\geq 1$ stricture (n)                         | The number of ducts with one or more stricture (n)                                           |

|                                                 |                                                                                                                               |
|-------------------------------------------------|-------------------------------------------------------------------------------------------------------------------------------|
| Ducts with $\geq 1$ dilatation (n)              | The number of ducts with one or more dilatation (n)                                                                           |
| Duct with $\geq 1$ stricture OR dilatation (n)  | The number of ducts with one or more stricture or dilatation (n)                                                              |
| Duct with $\geq 1$ stricture AND dilatation (n) | The number of ducts with one or more stricture and one or more dilatation (n)                                                 |
| Duct with $\geq 1$ stricture OR dilatation (%)  | The percentage of ducts with one or more stricture or dilatation (%)                                                          |
| Duct with $\geq 1$ stricture AND dilatation (%) | The percentage of ducts with one or more stricture and one or more dilatation (%)                                             |
| Abnormal length sum (mm)                        | The total length (mm) of detected abnormalities (stricture length sum + dilatation length sum)                                |
| Abnormal length percentage (%)                  | The percentage of the tree centreline marked as abnormal ( $100 \times \text{abnormal length sum} / \text{duct length sum}$ ) |

**Supplemental Table 2. MRCP derived metrics in 77 PSC patients**

|                                                                              | <b>Median (IQR)</b> |
|------------------------------------------------------------------------------|---------------------|
| Number of modelled ducts                                                     | 86 (53 – 137)       |
| Distribution of patients according to quartiles of number of modelled ducts: |                     |
| - 1 <sup>st</sup> quartile: < 53 modelled ducts                              | 19(24.7)            |
| - 2 <sup>nd</sup> quartile: 54-85 modelled ducts                             | 18(23.4)            |
| - 3 <sup>rd</sup> quartile: 86-136 modelled ducts                            | 21(27.3)            |
| - 4 <sup>th</sup> quartile: >137 modelled ducts                              | 19(24.7)            |
| Biliary tree volume (mL)                                                     | 15.2 (8.5 – 20.9)   |
| Gallbladder volume                                                           | 47.4 (18.1-83.7)    |
| <b>Duct length metrics</b>                                                   |                     |
| Duct length mean (mm)                                                        | 19 (17 - 21)        |
| Duct length median (mm)                                                      | 12 (11 - 14)        |
| Duct length max (mm)                                                         | 105 (85 - 131)      |
| Duct length sum (mm)                                                         | 1608 (956 – 2527)   |
| Duct diameter median (mm)                                                    | 2.5 (2.4 -2.7)      |
| Duct diameter range 0-1 mm (%)                                               | 0                   |
| Duct diameter range 1-3 mm (%)                                               | 75 (65 – 80)        |
| Duct diameter range 3-5 mm (%)                                               | 22(15 – 30)         |
| Duct diameter range 5-7 mm (%)                                               | 2 (0 – 4)           |
| Duct diameter range 7-9 mm (%)                                               | 0 (0-1)             |
| Duct diameter > 9 mm (%)                                                     | 0                   |
| <b>Strictures metrics</b>                                                    |                     |
| Stricture number (n)                                                         | 11 (7 – 18)         |
| Strictures types (n)                                                         |                     |
| - Band (<3 mm)                                                               | 1 (0 – 1)           |
| - Segmental (3-10 mm)                                                        | 8.0 (4.0 – 14.0)    |

|                                   |                       |
|-----------------------------------|-----------------------|
| - Confluent ( $\geq 10$ mm)       | 2.0 (1.0 – 4.0)       |
| Stricture length mean (mm)        | 6.7 (5.8 -8.1)        |
| Stricture length max (mm)         | 14.4 (10.2 – 20.1)    |
| Stricture length sum (mm)         | 77.6 (36.2 – 143.0)   |
| Stricture minimal diameter (mm)   | 1.3 (1.2 - 1.5)       |
| Stricture severity absolute mean  | 1.5 (1.4 – 1.7)       |
| Stricture severity absolute max   | 2.6 (1.9 - 3.5)       |
| Stricture severity absolute sum   | 18.1 (9.8 $\pm$ 28.6) |
| Stricture severity relative mean  | 41.8 (39.8 - 43.4)    |
| Stricture severity relative max   | 55.7 (50.9 – 64.0)    |
| Stricture severity relative sum   | 479.9 (266.6 – 733.4) |
| Stricture score mean              | 2.9 (2.5 -3.3)        |
| Stricture score max               | 6.4 (4.3 -8.6)        |
| Stricture score sum               | 34.7 (16.3 – 56.9)    |
| <b>Dilatations metrics</b>        |                       |
| Dilatation number                 | 21 (11-34)            |
| Dilatation length mean            | 6.3 (5.4 – 7.5)       |
| Dilatation length max             | 18.5 (14.0 – 25.2)    |
| Dilatation length sum             | 123.5 (70.8 – 210)    |
| Dilatation diameter max           | 8.4 (7.0 – 10.5)      |
| Dilatation severity absolute mean | 1.8 (1.6 – 2.0)       |
| Dilatation severity absolute max  | 4.0 (2.9 – 5.7)       |
| Dilatation severity absolute sum  | 39.6 (19.4 – 64.9)    |
| Dilatation severity absolute mean | 65.5 (59.2 – 73.9)    |
| Dilatation severity relative max  | 153.7 (100.2 – 210.9) |
| Dilatation severity relative sum  | 1544 (744 – 2253)     |
| Dilatation score mean             | 4.5 (3.5 -5.2)        |
| Dilatation score max              | 15.7 (11.8 – 27.3)    |

|                                                                    |                    |
|--------------------------------------------------------------------|--------------------|
| Dilatation score sum                                               | 91.4 (52.4 -148.9) |
| <b>Strictures and/or dilatations</b>                               |                    |
| Ducts with $\geq 1$ stricture (n)                                  | 9.0 (5.0 – 15.0)   |
| Ducts with $\geq 1$ dilatation (n)                                 | 9.0 (17.0 – 26.5)  |
| Duct with $\geq 1$ stricture OR dilatation (n)                     | 20.0 (10.5 – 32.0) |
| Duct with $\geq 1$ stricture AND dilatation (n)                    | 6.0 (3.0 – 11.0)   |
| Duct with $\geq 1$ stricture OR dilatation (%)                     | 23.0 (18.6 – 27.2) |
| Duct with $\geq 1$ stricture AND dilatation (%)                    | 7.7 (4.5 – 9.6)    |
| Abnormal length sum (stricture length sum + dilatation length sum) | 219 (98 -352)      |
| Percentage of tree centerline abnormal                             | 13.1 (9.7 -17.7)   |









|                           |   |             |       |             |       |       |      |             |             |             |             |             |             |             |             |              |             |             |             |             |             |              |      |             |             |      |             |             |       |             |             |              |             |             |             |             |             |             |             |             |             |             |             |             |             |             |             |             |             |             |             |      |  |
|---------------------------|---|-------------|-------|-------------|-------|-------|------|-------------|-------------|-------------|-------------|-------------|-------------|-------------|-------------|--------------|-------------|-------------|-------------|-------------|-------------|--------------|------|-------------|-------------|------|-------------|-------------|-------|-------------|-------------|--------------|-------------|-------------|-------------|-------------|-------------|-------------|-------------|-------------|-------------|-------------|-------------|-------------|-------------|-------------|-------------|-------------|-------------|-------------|-------------|------|--|
| Stricture length max (mm) | p | 0,68        | 0,47  | 0,82        | 0,59  | 0,18  | 0,88 | <b>0,00</b> | 0,85        | <b>0,00</b> | <b>0,00</b> | <b>0,04</b> | 0,75        | <b>0,03</b> | <b>0,00</b> | 0,34         | 0,29        | <b>0,00</b> | <b>0,00</b> | <b>0,00</b> | <b>0,00</b> | 0,13         | 0,46 | <b>0,00</b> | 0,21        | 0,21 | 0,62        | <b>0,00</b> | 0,07  | 0,75        | <b>0,00</b> | <b>0,00</b>  | 0,64        | <b>0,00</b> | <b>0,00</b> | <b>0,00</b> | 0,40        | <b>0,05</b> | <b>0,00</b> | 0,08        | <b>0,00</b> | <b>0,00</b> | <b>0,00</b> | <b>0,00</b> | <b>0,02</b> | <b>0,02</b> | <b>0,00</b> | <b>0,00</b> | <b>0,00</b> |             |             | 0,00 |  |
| Stricture length sum (mm) | R | 0,22        | -0,07 | 0,17        | -0,03 | -0,14 | 0,10 | <b>0,95</b> | <b>0,32</b> | <b>0,89</b> | <b>0,85</b> | -0,21       | 0,14        | <b>0,50</b> | <b>0,92</b> | <b>-0,26</b> | <b>0,31</b> | <b>0,95</b> | <b>0,25</b> | <b>0,63</b> | <b>0,99</b> | <b>-0,33</b> | 0,14 | <b>0,83</b> | <b>0,44</b> | 0,11 | <b>0,43</b> | <b>0,82</b> | -0,08 | 0,31        | <b>0,84</b> | <b>-0,32</b> | 0,16        | <b>0,76</b> | <b>0,87</b> | <b>0,91</b> | <b>0,23</b> | <b>0,41</b> | <b>0,93</b> | <b>0,32</b> | <b>0,95</b> | <b>0,85</b> | <b>0,87</b> | <b>0,80</b> | 0,17        | 0,18        | <b>0,39</b> | <b>0,83</b> | <b>0,41</b> | 0,73        | 1,00        |      |  |
|                           | p | 0,06        | 0,55  | 0,14        | 0,82  | 0,23  | 0,38 | <b>0,00</b> | <b>0,00</b> | <b>0,00</b> | <b>0,00</b> | 0,06        | 0,21        | <b>0,00</b> | <b>0,00</b> | <b>0,02</b>  | <b>0,01</b> | <b>0,00</b> | <b>0,03</b> | <b>0,00</b> | <b>0,00</b> | <b>0,00</b>  | 0,22 | <b>0,00</b> | <b>0,00</b> | 0,36 | <b>0,00</b> | <b>0,00</b> | 0,47  | 0,01        | <b>0,00</b> | <b>0,00</b>  | 0,16        | <b>0,00</b> | <b>0,00</b> | <b>0,00</b> | <b>0,04</b> | <b>0,00</b> | <b>0,00</b> | <b>0,01</b> | <b>0,00</b> | <b>0,00</b> | <b>0,00</b> | <b>0,00</b> | 0,13        | 0,12        | <b>0,00</b> | <b>0,00</b> | <b>0,00</b> | 0,00        |             |      |  |
| Biliary tree volume       | R | <b>0,29</b> | -0,19 | <b>0,28</b> | 0,03  | -0,04 | 0,16 | <b>0,86</b> | <b>0,41</b> | <b>0,83</b> | <b>0,63</b> | -0,07       | <b>0,29</b> | <b>0,49</b> | <b>0,86</b> | <b>-0,28</b> | <b>0,24</b> | <b>0,85</b> | 0,02        | <b>0,41</b> | <b>0,82</b> | <b>-0,33</b> | 0,19 | <b>0,91</b> | <b>0,51</b> | 0,20 | <b>0,51</b> | <b>0,91</b> | -0,08 | <b>0,44</b> | <b>0,90</b> | <b>-0,26</b> | <b>0,32</b> | <b>0,86</b> | <b>0,94</b> | <b>0,84</b> | 0,10        | 0,15        | <b>0,91</b> | 0,07        | <b>0,87</b> | <b>0,93</b> | <b>0,93</b> | <b>0,93</b> | 0,11        | 0,21        | <b>0,36</b> | <b>0,94</b> | 0,17        | <b>0,51</b> | <b>0,84</b> | 1,00 |  |
|                           | p | <b>0,01</b> | 0,10  | <b>0,01</b> | 0,78  | 0,76  | 0,15 | <b>0,00</b> | <b>0,00</b> | <b>0,00</b> | <b>0,00</b> | 0,57        | <b>0,01</b> | <b>0,00</b> | <b>0,00</b> | <b>0,02</b>  | <b>0,04</b> | <b>0,00</b> | 0,84        | <b>0,00</b> | <b>0,00</b> | <b>0,00</b>  | 0,10 | <b>0,00</b> | <b>0,00</b> | 0,08 | <b>0,00</b> | <b>0,00</b> | 0,47  | <b>0,00</b> | <b>0,00</b> | <b>0,02</b>  | <b>0,01</b> | <b>0,00</b> | <b>0,00</b> | <b>0,00</b> | 0,41        | 0,18        | <b>0,00</b> | 0,52        | <b>0,00</b> | <b>0,00</b> | <b>0,00</b> | <b>0,00</b> | 0,34        | 0,07        | <b>0,00</b> | <b>0,00</b> | 0,13        | <b>0,00</b> | <b>0,00</b> |      |  |

Note: R = Spearman's rank correlation coefficient

Supplemental table 4. Correlations between MRCP+ derived metrics, biochemical indices, liver stiffness and prognostic scores.

|                                | Serum bilirubin         | AST                                      | ALP                                     | GGT                                     | Serum albumin                         | Platelets count         | Liver Stiffness                          | Anali score without gadolinium [2]       | Anali score with gadolinium [2]          | Mayo Risk Score [3]                   | Amsterdam - Oxford Model [4] |
|--------------------------------|-------------------------|------------------------------------------|-----------------------------------------|-----------------------------------------|---------------------------------------|-------------------------|------------------------------------------|------------------------------------------|------------------------------------------|---------------------------------------|------------------------------|
| Biliary tree volume            | R = -0.135<br>p = 0.240 | R = 0.008<br>p = 0.943                   | R = 0.061<br>p = 0.605                  | R = 0.110<br>p = 0.349                  | R = 0.023<br>p = 0.851                | R = 0.136<br>p = 0.851  | R = 0.075<br>p = 0.519                   | <b>R = 0.382</b><br><b>p = 0.001</b>     | <b>R = 0.273</b><br><b>p = 0.029</b>     | R = 0.057<br>p = 0.649                | R = -0.174<br>p = 0.349      |
| Total number of modelled ducts | R = -0.187<br>p = 0.104 | R = -0.042<br>p = 0.721                  | R = -0.030<br>p = 0.796                 | R = 0.047<br>p = 0.688                  | R = 0.114<br>p = 0.342                | R = 0.146<br>p = 0.211  | R = -0.034<br>p = 0.771                  | <b>R = 0.262</b><br><b>p = 0.021</b>     | R = 0.208<br>p = 0.098                   | R = -0.034<br>p = 0.787               | R = -0.317<br>p = 0.082      |
| Duct length mean (mm)          | R = 0.036<br>p = 0.757  | <b>R = -0.274</b><br><b>p = 0.017</b>    | R = -0.092<br>p = 0.434                 | R = -0.142<br>p = 0.223                 | R = 0.061<br>p = 0.616                | R = -0.073<br>p = 0.535 | R = -0.211<br>p = 0.065                  | R = -0.138<br>p = 0.230                  | R = -0.175<br>p = 0.167                  | R = -0.116<br>p = 0.353               | R = 0.056<br>p = 0.766       |
| Duct length median (mm)        | R = -0.045<br>p = 0.695 | <b>R = -0.274</b><br><b>p = 0.017</b>    | R = -0.167<br>p = 0.153                 | R = -0.158<br>p = 0.177                 | R = 0.184<br>p = 0.124                | R = -0.026<br>p = 0.825 | <b>R = -0.266</b><br><b>p = 0.019</b>    | R = -0.149<br>p = 0.197                  | R = -0.151<br>p = 0.233                  | R = -0.186<br>p = 0.135               | R = -0.085<br>p = 0.649      |
| Duct length max (mm)           | R = -0.105<br>p = 0.364 | R = 0.186<br>p = 0.110                   | R = -0.013<br>p = 0.912                 | R = -0.106<br>p = 0.363                 | R = 0.011<br>p = 0.930                | R = 0.193<br>p = 0.098  | R = -0.067<br>p = 0.564                  | R = -0.079<br>p = 0.495                  | R = 0.045<br>p = 0.723                   | R = 0.006<br>p = 0.962                | R = 0.127<br>p = 0.496       |
| Duct length sum (mm)           | R = -0.170<br>p = 0.138 | R = -0.096<br>p = 0.413                  | R = -0.041<br>p = 0.727                 | R = 0.008<br>p = 0.946                  | R = 0.119<br>p = 0.323                | R = 0.116<br>p = 0.322  | R = -0.065<br>p = 0.573                  | <b>R = 0.226</b><br><b>p = 0.048</b>     | R = 0.160<br>p = 0.206                   | R = -0.059<br>p = 0.640               | R = -0.255<br>p = 0.166      |
| Duct diameter median (mm)      | R = 0.108<br>p = 0.351  | <b>R = -0.422</b><br><b>p &lt; 0.001</b> | <b>R = 0.437</b><br><b>p &lt; 0.001</b> | <b>R = 0.399</b><br><b>p &lt; 0.001</b> | <b>R = -0.265</b><br><b>p = 0.025</b> | R = 0.077<br>p = 0.513  | <b>R = 0.511</b><br><b>p &lt; 0.001</b>  | <b>R = 0.714</b><br><b>p &lt; 0.001</b>  | <b>R = 0.645</b><br><b>p &lt; 0.001</b>  | <b>R = 0.340</b><br><b>p = 0.005</b>  | R = 0.302<br>p = 0.099       |
| Duct diameter range 1-3 mm (%) | R = -0.115<br>p = 0.321 | <b>R = -0.418</b><br><b>p &lt; 0.001</b> | <b>R = -0.379</b><br><b>p = 0.001</b>   | <b>R = -0.354</b><br><b>p = 0.002</b>   | <b>R = 0.272</b><br><b>p = 0.022</b>  | R = -0.073<br>p = 0.535 | <b>R = -0.474</b><br><b>p &lt; 0.001</b> | <b>R = -0.583</b><br><b>p &lt; 0.001</b> | <b>R = -0.453</b><br><b>p &lt; 0.001</b> | <b>R = -0.362</b><br><b>p = 0.003</b> | R = -0.340<br>p = 0.061      |

|                                          |                                      |                                      |                                      |                                      |                                       |                                      |                                         |                                         |                                         |                                         |                                      |
|------------------------------------------|--------------------------------------|--------------------------------------|--------------------------------------|--------------------------------------|---------------------------------------|--------------------------------------|-----------------------------------------|-----------------------------------------|-----------------------------------------|-----------------------------------------|--------------------------------------|
| Duct diameter range 3-5 mm (%)           | R = 0.043<br>p = 0.710               | <b>R = 0.337</b><br><b>p = 0.003</b> | <b>R = 0.321</b><br><b>p = 0.005</b> | <b>R = 0.319</b><br><b>p = 0.005</b> | R = -0.227<br>p = 0.057               | R = 0.094<br>p = 0.421               | <b>R = 0.389</b><br><b>p &lt; 0.001</b> | <b>R = 0.583</b><br><b>p &lt; 0.001</b> | <b>R = 0.483</b><br><b>p &lt; 0.001</b> | <b>R = 0.265</b><br><b>p = 0.031</b>    | R = 0.216<br>p = 0.244               |
| Duct diameter range 5-7 mm (%)           | R = 0.038<br>p = 0.740               | R = 0.201<br>p = 0.084               | R = 0.150<br>p = 0.198               | R = 0.209<br>p = 0.072               | R = -0.125<br>p = 0.299               | R = -0.028<br>p = 0.812              | <b>R = 0.288</b><br><b>p = 0.011</b>    | <b>R = 0.231</b><br><b>p = 0.044</b>    | R = 0.228<br>p = 0.070                  | R = 0.229<br>p = 0.065                  | <b>R = 0.373</b><br><b>p = 0.039</b> |
| Duct diameter range 7-9 mm (%)           | <b>R = 0.284</b><br><b>p = 0.012</b> | <b>R = 0.293</b><br><b>p = 0.011</b> | <b>R = 0.349</b><br><b>p = 0.002</b> | R = 0.198<br>p = 0.089               | <b>R = -0.342</b><br><b>p = 0.004</b> | R = -0.036<br>p = 0.762              | <b>R = 0.248</b><br><b>p = 0.030</b>    | R = 0.118<br>p = 0.308                  | R = 0.053<br>p = 0.680                  | <b>R = 0.434</b><br><b>p &lt; 0.001</b> | <b>R = 0.456</b><br><b>p = 0.010</b> |
| Duct diameter > 9 mm (%)                 | <b>R = 0.306</b><br><b>p = 0.007</b> | <b>R = 0.256</b><br><b>p = 0.027</b> | R = 0.177<br>p = 0.128               | <b>R = 0.237</b><br><b>p = 0.040</b> | R = -0.124<br>p = 0.303               | R = -0.178<br>p = 0.126              | R = 0.195<br>p = 0.089                  | R = 0.181<br>p = 0.115                  | R = 0.072<br>p = 0.571                  | R = 0.240<br>p = 0.052                  | R = 0.247<br>p = 0.180               |
| <b>Strictures metrics</b>                |                                      |                                      |                                      |                                      |                                       |                                      |                                         |                                         |                                         |                                         |                                      |
| Stricture number (n)                     | R = -0.033<br>p = 0.774              | R = 0.045<br>p = 0.704               | R = 0.188<br>p = 0.106               | R = 0.190<br>p = 0.103               | R = 0.010<br>p = 0.933                | R = 0.089<br>p = 0.448               | R = 0.087<br>p = 0.450                  | <b>R = 0.436</b><br><b>P &lt; 0.001</b> | <b>R = 0.346</b><br><b>p = 0.005</b>    | R = 0.081<br>p = 0.520                  | R = -0.156<br>p = 0.401              |
| Number of band (<3 mm) stricture         | R = -0.071<br>p = 0.540              | R = 0.117<br>p = 0.319               | R = 0.157<br>p = 0.179               | R = 0.115<br>p = 0.324               | R = -0.033<br>p = 0.783               | R = -0.117<br>p = 0.319              | <b>R = 0.348</b><br><b>p = 0.002</b>    | <b>R = 0.398</b><br><b>p &lt; 0.001</b> | <b>R = 0.291</b><br><b>p = 0.020</b>    | R = 0.130<br>p = 0.298                  | R = 0.047<br>p = 0.801               |
| Number of segmental (3-10 mm) strictures | R = -0.047<br>p = 0.687              | R = 0.015<br>p = 0.897               | R = 0.135<br>p = 0.249               | R = 0.155<br>p = 0.185               | R = 0.032<br>p = 0.788                | R = 0.050<br>p = 0.673               | R = 0.025<br>p = 0.829                  | <b>R = 0.404</b><br><b>p &lt; 0.001</b> | <b>R = 0.325</b><br><b>p = 0.009</b>    | R = 0.041<br>p = 0.747                  | R = -0.148<br>p = 0.428              |
| Number of confluent (≥ 10 mm) strictures | R = 0.033<br>p = 0.775               | R = 0.001<br>p = 0.990               | R = 0.156<br>p = 0.180               | R = 0.133<br>p = 0.256               | R = -0.007<br>p = 0.953               | <b>R = 0.248</b><br><b>P = 0.032</b> | R = 0.058<br>p = 0.618                  | <b>R = 0.246</b><br><b>p = 0.031</b>    | <b>R = 0.249</b><br><b>p = 0.047</b>    | R = 0.129<br>p = 0.303                  | R = -0.286<br>p = 0.118              |
| Stricture length mean (mm)               | R = 0.001<br>p = 0.993               | R = -0.163<br>p = 0.161              | R = -0.063<br>p = 0.593              | R = 0.008<br>p = 0.947               | R = 0.064<br>p = 0.595                | R = 0.173<br>p = 0.138               | R = -0.165<br>p = 0.152                 | R = -0.112<br>p = 0.330                 | R = 0.014<br>p = 0.912                  | R = -0.051<br>p = 0.682                 | R = -0.450<br>p = 0.011              |

|                                  |                          |                          |                          |                         |                          |                        |                         |                                         |                                       |                         |                          |
|----------------------------------|--------------------------|--------------------------|--------------------------|-------------------------|--------------------------|------------------------|-------------------------|-----------------------------------------|---------------------------------------|-------------------------|--------------------------|
|                                  |                          |                          |                          |                         |                          |                        |                         |                                         |                                       |                         |                          |
| Stricture length max (mm)        | R = 0.127<br>p = 0.270   | R = - 0.009<br>p = 0.937 | R = 0.101<br>p = 0.390   | R = 0.179<br>p = 0.125  | R = 0.046<br>p = 0.704   | R = 0.200<br>p = 0.085 | R = 0.018<br>p = 0.878  | R = 0.179<br>p = 0.119                  | R = 0.242<br>p = 0.054                | R = 0.160<br>p = 0.199  | R = - 0.285<br>p = 0.121 |
| Stricture length sum (mm)        | R = - 0.009<br>p = 0.939 | R = - 0.015<br>p = 0.901 | R = 0.127<br>p = 0.276   | R = 0.126<br>p = 0.280  | R = 0.059<br>p = 0.627   | R = 0.117<br>p = 0.318 | R = 0.039<br>p = 0.737  | <b>R = 0.347</b><br><b>p = 0.002</b>    | <b>R = 0.311</b><br><b>p = 0.012</b>  | R = 0.061<br>p = 0.626  | R = -0.219<br>p = 0.237  |
| Stricture minimal diameter (mm)  | R = 0.093<br>p = 0.422   | R = 0.119<br>p = 0.307   | R = 0.131<br>p = 0.264   | R = 0.025<br>p = 0.834  | R = -0.074<br>p = 0.540  | R = 0.100<br>p = 0.394 | R = 0.120<br>p = 0.297  | R = 0.110<br>p = 0.341                  | R = 0.060<br>p = 0.635                | R = -0.029<br>p = 0.817 | R = 0.116<br>p = 0.534   |
| Stricture severity absolute mean | R = - 0.095<br>p = 0.410 | R = 0.053<br>p = 0.653   | R = -0.011<br>p = 0.923  | R = 0.048<br>p = 0.682  | R = -0.112<br>p = 0.352  | R = 0.110<br>p = 0.349 | R = 0.063<br>p = 0.587  | R = 0.152<br>p = 0.188                  | R = -0.007<br>p = 0.958               | R = 0.204<br>p = 0.101  | R = 0.067<br>p = 0.721   |
| Stricture severity absolute max  | R = - 0.186<br>p = 0.105 | R = - 0.016<br>p = 0.889 | R = 0.029<br>p = 0.805   | R = 0.067<br>p = 0.568  | R = - 0.112<br>p = 0.310 | R = 0.052<br>p = 0.658 | R = 0.034<br>p = 0.772  | <b>R = 0.241</b><br><b>p = 0.034</b>    | R = 0.133<br>p = 0.296                | R = 0.169<br>p = 0.176  | R = 0.038<br>p = 0.840   |
| Stricture severity absolute sum  | R = - 0.066<br>p = 0.569 | R = 0.042<br>p = 0.720   | R = 0.197<br>p = 0.090   | R = 0.184<br>p = 0.114  | R = - 0.041<br>p = 0.732 | R = 0.136<br>p = 0.246 | R = 0.103<br>p = 0.374  | <b>R = 0.449</b><br><b>P &lt; 0.001</b> | <b>R = 0.337</b><br><b>p = 0.006</b>  | R = 0.143<br>p = 0.253  | R = - 0.098<br>p = 0.602 |
| Stricture severity relative mean | R = - 0.009<br>p = 0.939 | R = - 0.064<br>p = 0.583 | R = - 0.144<br>p = 0.217 | R = -0.054<br>p = 0.646 | R = 0.034<br>p = 0.777   | R = 0.025<br>p = 0.833 | R = -0.127<br>p = 0.271 | <b>R = - 0.235</b><br><b>p = 0.040</b>  | <b>R = -0.277</b><br><b>p = 0.027</b> | R = 0.146<br>p = 0.243  | R = 0.036<br>p = 0.846   |
| Stricture severity relative max  | R = - 0.065<br>p = 0.574 | R = 0.016<br>p = 0.893   | R = -0.004<br>p = 0.974  | R = 0.040<br>p = 0.735  | R = - 0.061<br>p = 0.616 | R = 0.002<br>p = 0.988 | R = 0.044<br>p = 0.706  | R = 0.148<br>p = 0.197                  | R = 0.066<br>p = 0.602                | R = 0.185<br>p = 0.137  | R = 0.139<br>p = 0.457   |
| Stricture severity relative sum  | R = - 0.049<br>p = 0.674 | R = 0.039<br>p = 0.737   | R = 0.182<br>p = 0.117   | R = 0.188<br>p = 0.105  | R = 0.017<br>p = 0.890   | R = 0.099<br>p = 0.400 | R = 0.081<br>p = 0.485  | <b>R = 0.431</b><br><b>p &lt; 0.001</b> | <b>R = 0.341</b><br><b>p = 0.006</b>  | R = 0.094<br>p = 0.452  | R = -0.163<br>p = 0.381  |
| Stricture score mean             | R = 0.008                | R = - 0.185              | R = -0.121               | R = -0.047              | R = 0.033                | R = 0.172              | R = -0.195              | R = -0.201                              | R = -0.098                            | R = 0.009               | <b>R = - 0.409</b>       |

|                                   |                          |                                      |                                      |                                      |                                       |                         |                                         |                                         |                                      |                                      |                                      |
|-----------------------------------|--------------------------|--------------------------------------|--------------------------------------|--------------------------------------|---------------------------------------|-------------------------|-----------------------------------------|-----------------------------------------|--------------------------------------|--------------------------------------|--------------------------------------|
|                                   | p = 0.944                | p = 0.113                            | p = 0.302                            | p = 0.690                            | p = 0.787                             | p = 0.140               | p = 0.09                                | p = 0.079                               | p = 0.440                            | p = 0.941                            | <b>p = 0.022</b>                     |
| Stricture score max               | R = 0.054<br>p = 0.639   | R = - 0.017<br>p = 0.886             | R = 0.094<br>p = 0.422               | R = 0.178<br>p = 0.126               | R = - 0.077<br>p = 0.523              | R = 0.182<br>p = 0.119  | R = 0.028<br>p = 0.812                  | R = 0.171<br>p = 0.137                  | R = 0.219<br>p = 0.082               | R = 0.194<br>p = 0.119               | R = -0.279<br>p = 0.128              |
| Stricture score sum               | R = - 0.034<br>p = 0.770 | R = - 0.031<br>p = 0.793             | R = 0.114<br>p = 0.329               | R = 0.125<br>p = 0.285               | R = 0.059<br>p = 0.623                | R = 0.136<br>p = 0.246  | R = 0.025<br>p = 0.831                  | <b>R = 0.338</b><br><b>p = 0.003</b>    | <b>R = 0.301</b><br><b>p = 0.016</b> | R = 0.079<br>p = 0.527               | R = -0.228<br>p = 0.217              |
| <b>Dilatations metrics</b>        |                          |                                      |                                      |                                      |                                       |                         |                                         |                                         |                                      |                                      |                                      |
| Dilatation number                 | R = - 0.113<br>p = 0.330 | R = 0.046<br>p = 0.694               | R = 0.134<br>p = 0.252               | R = 0.183<br>p = 0.115               | R = 0.015<br>p = 0.901                | R = 0.139<br>p = 0.233  | R = 0.075<br>p = 0.515                  | <b>R = 0.437</b><br><b>p &lt; 0.001</b> | <b>R = 0.347</b><br><b>p = 0.005</b> | R = 0.093<br>p = 0.458               | R = -0.216<br>p = 0.243              |
| Dilatation length mean            | R = 0.013<br>p = 0.908   | R = - 0.022<br>p = 0.852             | R = -0.166<br>p = 0.155              | R = -0.123<br>p = 0.293              | R = 0.103<br>p = 0.394                | R = -0.018<br>p = 0.878 | R = 0.055<br>p = 0.637                  | R = - 0.200<br>p = 0.081                | R = -0.165<br>p = 0.192              | R = -0.076<br>p = 0.543              | R = 0.009<br>p = 0.962               |
| Dilatation length max             | R = 0.008<br>p = 0.946   | R = 0.074<br>p = 0.526               | R = -0.019<br>p = 0.873              | R = -0.003<br>p = 0.979              | R = 0.060<br>p = 0.619                | R = 0.155<br>p = 0.185  | R = 0.181<br>p = 0.114                  | R = 0.126<br>p = 0.275                  | R = 0.190<br>p = 0.132               | R = 0.086<br>p = 0.491               | R = -0.003<br>p = 0.988              |
| Dilatation length sum             | R = - 0.106<br>p = 0.358 | R = 0.056<br>p = 0.634               | R = 0.127<br>p = 0.279               | R = 0.182<br>p = 0.117               | R = 0.018<br>p = 0.882                | R = 0.142<br>p = 0.224  | R = 0.103<br>p = 0.374                  | <b>R = 0.456</b><br><b>p &lt; 0.001</b> | <b>R = 0.347</b><br><b>p = 0.005</b> | R = 0.097<br>p = 0.436               | R = -0.208<br>p = 0.262              |
| Dilatation diameter max           | R = 0.071<br>p = 0.539   | R = 0.165<br>p = 0.158               | <b>R = 0.307</b><br><b>p = 0.007</b> | <b>R = 0.285</b><br><b>p = 0.013</b> | R = -0.023<br>p = 0.850               | R = 0.210<br>p = 0.071  | <b>R = 0.228</b><br><b>p = 0.046</b>    | <b>R = 0.456</b><br><b>p &lt; 0.001</b> | <b>R = 0.385</b><br><b>p = 0.002</b> | R = 0.159<br>p = 0.202               | R = 0.090<br>p = 0.629               |
| Dilatation severity absolute mean | R = 0.066<br>p = 0.571   | <b>R = 0.332</b><br><b>p = 0.004</b> | <b>R = 0.307</b><br><b>p = 0.007</b> | <b>R = 0.284</b><br><b>p = 0.014</b> | <b>R = -0.289</b><br><b>p = 0.014</b> | R = 0.008<br>p = 0.945  | <b>R = 0.409</b><br><b>p &lt; 0.001</b> | <b>R = 0.457</b><br><b>p &lt; 0.001</b> | R = 0.232<br>p = 0.065               | <b>R = 0.370</b><br><b>p = 0.002</b> | <b>R = 0.466</b><br><b>p = 0.008</b> |

|                                      |                          |                                      |                                      |                                      |                          |                         |                                      |                                         |                                      |                                      |                                      |
|--------------------------------------|--------------------------|--------------------------------------|--------------------------------------|--------------------------------------|--------------------------|-------------------------|--------------------------------------|-----------------------------------------|--------------------------------------|--------------------------------------|--------------------------------------|
| Dilatation severity absolute max     | R = 0.107<br>p = 0.353   | <b>R = 0.251</b><br><b>p = 0.030</b> | <b>R = 0.357</b><br><b>p = 0.002</b> | <b>R = 0.324</b><br><b>p = 0.005</b> | R = -0.210<br>p = 0.079  | R = 0.079<br>p = 0.499  | <b>R = 0.264</b><br><b>p = 0.021</b> | <b>R = 0.567</b><br><b>p &lt; 0.001</b> | <b>R = 0.358</b><br><b>p = 0.004</b> | <b>R = 0.344</b><br><b>p = 0.005</b> | R = 0.242<br>p = 0.189               |
| Dilatation severity absolute sum     | R = - 0.106<br>p = 0.361 | R = 0.101<br>p = 0.386               | R = 0.215<br>p = 0.064               | <b>R = 0.254</b><br><b>p = 0.028</b> | R = -0.067<br>p = 0.577  | R = 0.145<br>p = 0.215  | R = 0.159<br>p = 0.166               | <b>R = 0.521</b><br><b>p &lt; 0.001</b> | <b>R = 0.394</b><br><b>p = 0.001</b> | R = 0.177<br>p = 0.156               | R = -0.115<br>p = 0.540              |
| Dilatation severity relative mean    | R = 0.137<br>p = 0.234   | <b>R = 0.390</b><br><b>p = 0.001</b> | <b>R = 0.363</b><br><b>p = 0.001</b> | <b>R = 0.374</b><br><b>p = 0.001</b> | R = -0.199<br>p = 0.097  | R = -0.086<br>p = 0.462 | <b>R = 0.336</b><br><b>p = 0.003</b> | R = 0.191<br>p = 0.096                  | R = 0.084<br>p = 0.511               | <b>R = 0.390</b><br><b>p = 0.001</b> | <b>R = 0.440</b><br><b>p = 0.013</b> |
| Dilatation severity relative max     | R = 0.051<br>p = 0.662   | <b>R = 0.313</b><br><b>p = 0.006</b> | <b>R = 0.358</b><br><b>p = 0.002</b> | <b>R = 0.377</b><br><b>p = 0.001</b> | R = -0.230<br>p = 0.054  | R = 0.066<br>p = 0.574  | <b>R = 0.250</b><br><b>p = 0.029</b> | <b>R = 0.469</b><br><b>p &lt; 0.001</b> | <b>R = 0.298</b><br><b>p = 0.017</b> | <b>R = 0.393</b><br><b>p = 0.001</b> | R = -0.137<br>p = 0.461              |
| Dilatation severity relative sum     | R = - 0.107<br>p = 0.352 | R = 0.102<br>p = 0.383               | R = 0.203<br>p = 0.080               | <b>R = 0.248</b><br><b>p = 0.032</b> | R = - 0.052<br>p = 0.665 | R = 0.142<br>p = 0.225  | R = 0.146<br>p = 0.205               | <b>R = 0.481</b><br><b>p &lt; 0.001</b> | <b>R = 0.382</b><br><b>p = 0.002</b> | R = 0.174<br>p = 0.162               | R = -0.137<br>p = 0.461              |
| Dilatation score mean                | R = 0.037<br>p = 0.751   | R = 0.181<br>p = 0.120               | R = 0.071<br>p = 0.547               | R = 0.115<br>p = 0.326               | R = -0.063<br>p = 0.603  | R = -0.075<br>p = 0.520 | <b>R = 0.226</b><br><b>p = 0.048</b> | R = 0.046<br>p = 0.689                  | R = -0.034<br>p = 0.791              | R = 0.147<br>p = 0.239               | R = 0.250<br>p = 0.174               |
| Dilatation score max                 | R = 0.015<br>p = 0.897   | R = 0.167<br>p = 0.153               | R = 0.112<br>p = 0.339               | R = 0.217<br>p = 0.062               | R = -0.141<br>p = 0.242  | R = 0.031<br>p = 0.792  | <b>R = 0.248</b><br><b>p = 0.029</b> | <b>R = 0.423</b><br><b>p &lt; 0.001</b> | R = 0.185<br>p = 0.144               | R = 0.213<br>p = 0.239               | R = 0.123<br>p = 0.510               |
| Dilatation score sum                 | R = - 0.108<br>p = 0.350 | R = 0.115<br>p = 0.325               | R = 0.187<br>p = 0.108               | <b>R = 0.249</b><br><b>p = 0.031</b> | R = -0.065<br>p = 0.591  | R = 0.116<br>p = 0.320  | R = 0.182<br>p = 0.114               | <b>R = 0.526</b><br><b>p &lt; 0.001</b> | <b>R = 0.385</b><br><b>p = 0.002</b> | R = 0.188<br>p = 0.130               | R = -0.069<br>p = 0.712              |
| <b>Strictures and/or dilatations</b> |                          |                                      |                                      |                                      |                          |                         |                                      |                                         |                                      |                                      |                                      |
| Ducts with ≥ 1 stricture (n)         | R = - 0.032<br>p = 0.785 | R = 0.019<br>p = 0.872               | R = 0.147<br>p = 0.210               | R = 0.157<br>p = 0.177               | R = 0.053<br>p = 0.658   | R = 0.086<br>p = 0.461  | R = 0.020<br>p = 0.860               | <b>R = 0.410</b><br><b>p &lt; 0.001</b> | <b>R = 0.341</b><br><b>p = 0.007</b> | R = 0.053<br>p = 0.670               | R = -0.194<br>p = 0.296              |
| Ducts with ≥ 1 dilatation (n)        | R = - 0.119<br>p = 0.304 | R = 0.043<br>p = 0.715               | R = 0.108<br>p = 0.356               | R = 0.166<br>p = 0.154               | R = 0.059<br>p = 0.628   | R = 0.112<br>p = 0.338  | R = 0.076<br>p = 0.512               | <b>R = 0.399</b><br><b>p &lt; 0.001</b> | <b>R = 0.336</b><br><b>p = 0.007</b> | R = 0.078<br>p = 0.534               | R = -0.148<br>p = 0.427              |



|                                                                    |                                      |                                      |                                         |                                         |                         |                         |                                      |                                         |                                         |                                      |                         |
|--------------------------------------------------------------------|--------------------------------------|--------------------------------------|-----------------------------------------|-----------------------------------------|-------------------------|-------------------------|--------------------------------------|-----------------------------------------|-----------------------------------------|--------------------------------------|-------------------------|
| Duct with $\geq 1$ stricture OR dilatation (n)                     | R = -0.097<br>p = 0.400              | R = 0.045<br>p = 0.700               | R = 0.108<br>p = 0.356                  | R = 0.149<br>p = 0.202                  | R = 0.078<br>p = 0.515  | R = 0.104<br>p = 0.376  | <b>R = 0.238</b><br><b>p = 0.037</b> | <b>R = 0.388</b><br><b>p &lt; 0.001</b> | <b>R = 0.339</b><br><b>p = 0.006</b>    | R = 0.054<br>p = 0.664               | R = -0.194<br>p = 0.296 |
| Duct with $\geq 1$ stricture AND dilatation (n)                    | R = -0.052<br>p = 0.654              | R = 0.024<br>p = 0.840               | R = 0.147<br>p = 0.207                  | R = 0.192<br>p = 0.099                  | R = 0.002<br>p = 0.989  | R = 0.117<br>p = 0.316  | R = 0.195<br>p = 0.089               | <b>R = 0.422</b><br><b>p &lt; 0.001</b> | <b>R = 0.306</b><br><b>p = 0.014</b>    | R = 0.114<br>p = 0.360               | R = -0.148<br>p = 0.427 |
| Duct with $\geq 1$ stricture OR dilatation (%)                     | <b>R = 0.303</b><br><b>p = 0.007</b> | <b>R = 0.345</b><br><b>p = 0.002</b> | <b>R = 0.482</b><br><b>p &lt; 0.001</b> | <b>R = 0.398</b><br><b>p &lt; 0.001</b> | R = -0.116<br>p = 0.334 | R = -0.206<br>p = 0.077 | <b>R = 0.238</b><br><b>p = 0.037</b> | <b>R = 0.440</b><br><b>p &lt; 0.001</b> | <b>R = 0.428</b><br><b>p &lt; 0.001</b> | <b>R = 0.380</b><br><b>p = 0.002</b> | R = 0.354<br>p = 0.050  |
| Duct with $\geq 1$ stricture AND dilatation (%)                    | R = 0.183<br>p = 0.111               | R = 0.109<br>p = 0.350               | <b>R = 0.312</b><br><b>p = 0.006</b>    | <b>R = 0.264</b><br><b>p = 0.022</b>    | R = -0.106<br>p = 0.379 | R = -0.110<br>p = 0.349 | R = 0.195<br>p = 0.089               | <b>R = 0.371</b><br><b>p &lt; 0.001</b> | R = 0.232<br>p = 0.065                  | R = 0.235<br>p = 0.057               | R = 0.147<br>p = 0.431  |
| Abnormal length sum (stricture length sum + dilatation length sum) | R = -0.071<br>p = 0.539              | R = 0.041<br>p = 0.730               | R = 0.143<br>p = 0.220                  | R = 0.178<br>p = 0.126                  | R = 0.006<br>p = 0.961  | R = 0.126<br>p = 0.281  | R = 0.089<br>p = 0.443               | <b>R = 0.446</b><br><b>p &lt; 0.001</b> | <b>R = 0.357</b><br><b>p = 0.004</b>    | R = 0.102<br>p = 0.416               | R = -0.195<br>p = 0.293 |
| Percentage of tree centerline abnormal                             | <b>R = 0.250</b><br><b>p = 0.028</b> | <b>R = 0.319</b><br><b>p = 0.005</b> | <b>R = 0.441</b><br><b>p &lt; 0.001</b> | <b>R = 0.409</b><br><b>p &lt; 0.001</b> | R = -0.212<br>p = 0.075 | R = -0.059<br>p = 0.614 | <b>R = 0.372</b><br><b>p = 0.001</b> | <b>R = 0.481</b><br><b>p &lt; 0.001</b> | <b>R = 0.434</b><br><b>p &lt; 0.001</b> | <b>R = 0.393</b><br><b>p = 0.001</b> | R = 0.159<br>p = 0.392  |

Note: R= Spearman's rank correlation coefficient

**Supplemental table 5. Distribution of MRCP derived metrics according ANALI score without gadolinium[2]**

|                                         | <b>ANALI without ≤ 2</b><br>N=35 | <b>ANALI without &gt; 2</b><br>N=42 | <b>p</b>     |
|-----------------------------------------|----------------------------------|-------------------------------------|--------------|
| <b>Total n. of modelled ducts</b>       | <b>67(44-104)</b>                | <b>111(57-155)</b>                  | <b>0.047</b> |
| <b>Biliary tree volume (mL)</b>         | <b>11.5(6.5-18.4)</b>            | <b>18.0(11.3-24.7)</b>              | <b>0.048</b> |
| Gallbladder volume (mL)                 | 33.1(17.7-61.2)                  | 62.1(20.5-94.4)                     | 0.111        |
| Mean duct length                        | 19.2(16.8-21.6)                  | 17.8(16.5-19.8)                     | 0.108        |
| Median duct length                      | 12.4(11.5-14.5)                  | 11.8(11.3-12.9)                     | 0.127        |
| Max duct length                         | 105.2(82.9-137.0)                | 104(86-128)                         | 0.720        |
| Duct length sum                         | 1455.7(835.4-2207.5)             | 2008.3(1038.4-2581.5)               | 0.138        |
| <b>Median diameter</b>                  | <b>2.4(2.2-2.5)</b>              | <b>2.6(2.5-2.8)</b>                 | <b>0.000</b> |
| % ducts with median diam. 0-1 mm        | 0(0-0)                           | 0(0-0)                              | 1.00         |
| <b>% ducts with median diam. 1-3 mm</b> | <b>79(73-85)</b>                 | <b>67(60-80)</b>                    | <b>0.000</b> |
| <b>% ducts with median diam. 3-5 mm</b> | <b>19(13-22)</b>                 | <b>28(18-36)</b>                    | <b>0.000</b> |
| % ducts with median diam. 5-7 mm        | 1(0-4)                           | 2(1-3)                              | 0.095        |
| % ducts with median diam. 7-9 mm        | 0(0-1)                           | 0(0-1)                              | 0.813        |
| % ducts with median diam. > 9 mm        | 0(0-0)                           | 0(0-0)                              | 0.145        |
| <b>Total n. of strictures</b>           | <b>8(4-13)</b>                   | <b>14(11-22)</b>                    | <b>0.001</b> |
| <b>N. of band strictures</b>            | <b>0(0-1)</b>                    | <b>1(0-2)</b>                       | <b>0.005</b> |
| <b>N. of segmental strictures</b>       | <b>7(4-9)</b>                    | <b>11(7-17)</b>                     | <b>0.002</b> |
| <b>N. of confluent strictures</b>       | <b>1(0-3)</b>                    | <b>2.5(1-4)</b>                     | <b>0.030</b> |
| Mean stricture length                   | 6.7(5.8-8.4)                     | 6.9(5.7-8.0)                        | 0.682        |
| Max stricture length                    | 12.9(9.0-18.0)                   | 15.6(10.7-21.1)                     | 0.100        |
| <b>Sum of stricture length</b>          | <b>46.8 (30.4-98.6)</b>          | <b>95.0(68.6-156.5)</b>             | <b>0.005</b> |
| Minimum strict. diameter                | 1.3(1.2-1.4)                     | 1.3(1.2-1.5)                        | 0.963        |
| Mean absolute strict. severity          | 1.5(1.4-1.7)                     | 1.5(1.5-1.7)                        | 0.782        |

|                                                    |                            |                              |              |
|----------------------------------------------------|----------------------------|------------------------------|--------------|
| Max absolute strict. severity                      | 2.5(1.8-3.2)               | 2.7(2.2-3.7)                 | 0.163        |
| <b>Sum absolute strict. severity</b>               | <b>11.3(7.2-20.9)</b>      | <b>23.4(16.9-36.7)</b>       | <b>0.001</b> |
| <b>Mean relative strict. severity</b>              | <b>42.8(40.3-44.7)</b>     | <b>41.3(39.3-42.8)</b>       | <b>0.019</b> |
| Max relative strict. severity                      | 55.0(48.9-62.7)            | 56.1(51.5-64.8)              | 0.201        |
| <b>Sum of relative strict. severity</b>            | <b>352.2(208.9-517.1)</b>  | <b>570.5(432.0-881.0)</b>    | <b>0.001</b> |
| Mean stricture score                               | 2.9(2.5-3.6)               | 2.7(2.4-3.2)                 | 0.197        |
| Max stricture score                                | 6.1(3.9-7.7)               | 7.1(5.0-9.1)                 | 0.120        |
| <b>Sum of stricture score</b>                      | <b>20.9(13.9-36.6)</b>     | <b>39.7(28.3-69.1)</b>       | <b>0.006</b> |
| <b>Stricture score TSS</b>                         | <b>1.0(1.00-1.00)</b>      | <b>1(1-1)</b>                | <b>0.002</b> |
| <b>Number of dilatations</b>                       | <b>15(8-23)</b>            | <b>30(18-37)</b>             | <b>0.001</b> |
| Mean length of dilatations                         | 7.0(5.3-7.8)               | 6.2(5.3-6.6)                 | 0.170        |
| Max length of dilatations                          | 17.3(12.5-23.4)            | 19.2(16.1-26.8)              | 0.187        |
| <b>Sum of length dilatations</b>                   | <b>105.2(49.0-146.7)</b>   | <b>174.9(113.5-224.6)</b>    | <b>0.001</b> |
| <b>Max dilatation diameter</b>                     | <b>7.6(6.3-9.7)</b>        | <b>9.0(7.8-11.5)</b>         | <b>0.004</b> |
| <b>Mean of absolute dilatation severity</b>        | <b>1.7(1.5-1.9)</b>        | <b>1.9(1.7-2.1)</b>          | <b>0.000</b> |
| <b>Max of absolute dilatation severity</b>         | <b>3.0(2.6-4.1)</b>        | <b>4.9(3.7-6.4)</b>          | <b>0.000</b> |
| <b>Sum of absolute dilatation severity</b>         | <b>24.4(15.9-40)</b>       | <b>52.6(37.4-83.3)</b>       | <b>0.000</b> |
| Mean relative dilatation severity                  | 64.0(58.3-72.1)            | 68.4(61.5-75.7)              | 0.060        |
| <b>Max relative dilatation severity</b>            | <b>121.3(94.0-156.6)</b>   | <b>171.3(138.7-255.4)</b>    | <b>0.000</b> |
| <b>Sum of relative dilatation severity</b>         | <b>955.3(632.4-1552.2)</b> | <b>2017.1(1222.4-2501.8)</b> | <b>0.000</b> |
| Mean score of dilatations                          | 4.5(3.4-5.2)               | 4.3(3.8-5.3)                 | 0.736        |
| <b>Max score of dilatations</b>                    | <b>13.6(8.5-22.0)</b>      | <b>18.2(14.2-32.5)</b>       | <b>0.000</b> |
| <b>Sum dilatation score</b>                        | <b>62.8(36.3-98.7)</b>     | <b>123.8(83.5-175.2)</b>     | <b>0.000</b> |
| <b>N. of ducts with stricture</b>                  | <b>7(4-10)</b>             | <b>12(8.5-18.3)</b>          | <b>0.001</b> |
| <b>N. of ducts with dilatation</b>                 | <b>13(7-18)</b>            | <b>23(11.8-29.5)</b>         | <b>0.002</b> |
| <b>N. of ducts with strictures or dilatations</b>  | <b>15(10-21)</b>           | <b>28.5(14.8-35.3)</b>       | <b>0.002</b> |
| <b>N. of ducts with strictures and dilatations</b> | <b>4(2-7)</b>              | <b>8(5-12)</b>               | <b>0.003</b> |
| <b>% of ducts with strictures or dilatations</b>   | <b>18(15-23)</b>           | <b>25(21-28)</b>             | <b>0.000</b> |

|                                                   |                          |                           |              |
|---------------------------------------------------|--------------------------|---------------------------|--------------|
| <b>% of ducts with strictures and dilatations</b> | <b>6(4-9)</b>            | <b>8(5-10)</b>            | <b>0.032</b> |
| <b>Sum of abnormal length</b>                     | <b>158.3(83.3-219.6)</b> | <b>255.2(199.3-369.2)</b> | <b>0.001</b> |
| <b>% of abnormal length</b>                       | <b>11(8-13)</b>          | <b>14.9(11.7-18.5)</b>    | <b>0.000</b> |

## REFERENCES

- [1] Goldfinger MH, Ridgway GR, Ferreira C, Langford CR, Cheng L, Kazimianec A, et al. Quantitative MRCP Imaging: Accuracy, Repeatability, Reproducibility, and Cohort-Derived Normative Ranges. *J Magn Reson Imaging* 2020;52:807–20. <https://doi.org/10.1002/jmri.27113>.
- [2] Ruiz A, Lemoine S, Carrat F, Corpechot C, Chazouillères O, Arrivé L. Radiologic course of primary sclerosing cholangitis: assessment by three-dimensional magnetic resonance cholangiography and predictive features of progression. *Hepatology* 2014;59:242–50. <https://doi.org/10.1002/hep.26620>.
- [3] Kim WR, Therneau TM, Wiesner RH, Poterucha JJ, Benson JT, Malinchoc M, et al. A revised natural history model for primary sclerosing cholangitis. *Mayo Clin Proc* 2000;75:688–94. <https://doi.org/10.4065/75.7.688>.
- [4] de Vries EM, Wang J, Williamson KD, Leeflang MM, Boonstra K, Weersma RK, et al. A novel prognostic model for transplant-free survival in primary sclerosing cholangitis. *Gut* 2018;67:1864–9. <https://doi.org/10.1136/gutjnl-2016-313681>.
